1 **Running head:** REML with the algorithm for proven and young

2

3 **Is single-step genomic REML with the algorithm for proven and young more**  
4 **computationally efficient when less generations of data are present?**

5

6 Vinícius Silva Junqueira\*<sup>1,2</sup>, Daniela Lourenco†, Yutaka Masuda†, Fernando Flores Cardoso‡,  
7 Paulo Sávio Lopes\*, Fabyano Fonseca e Silva\*, Ignacy Misztal†

8

9 <sup>2</sup> Breeding Research Department, Bayer Crop Science, Uberlândia, Minas Gerais, Brazil

10 \* Departamento de Zootecnia, Universidade Federal de Viçosa, Viçosa, Minas Gerais, Brazil

11 † Department of Dairy and Animal Science, University of Georgia, Athens, Georgia, United  
12 States

13 ‡ Empresa Brasileira de Pesquisa Agropecuária (EMBRAPA) Pecuária Sul, Bagé, Rio Grande do  
14 Sul, Brasil

15

16

17

18 <sup>1</sup> Corresponding author: [viniciussilva.junqueira@bayer.com](mailto:viniciussilva.junqueira@bayer.com)

19

## 20 **Lay Summary**

21       The estimation of variance components is computationally expensive under large-scale  
22 genetic evaluations due to several inversions of the coefficient matrix. Variance components are  
23 used as parameters for estimating breeding values in mixed model equations (MME). However,  
24 resulting breeding values are not Best Linear Unbiased Predictions (BLUP) unless the variance  
25 components approach the true parameters. The increasing availability of genomic data requires  
26 the development of new methods for improving the efficiency of variance component  
27 estimations. Therefore, this study aimed to reduce the costs of single-step genomic REML  
28 (ssGREML) with the Algorithm for Proven and Young (APY) for estimating variance  
29 components with truncated pedigree and phenotypes. In addition, we investigated the influence  
30 of truncation on variance components and genetic parameter estimates. Under APY, the size of  
31 the core group influences the similarity of breeding values and their reliability compared to the  
32 full genomic matrix. In this study, we found that to ensure reliable variance component  
33 estimation it is required to consider a core size that corresponds to the number of largest  
34 eigenvalues explaining around 98% of the total variation in  $\mathbf{G}$  to avoid biased parameters. In  
35 terms of costs, the use of APY slightly decreased the time for ordering and symbolic  
36 factorization with no impact on estimations.

37

## 38 **Teaser Text**

39 Estimation of variance components is becoming computationally challenging due to the  
40 increasing size of genomic information. We investigated the impacts of using the algorithm for  
41 proven and young (APY) in genetic evaluations. The use of APY has no impact on variance  
42 components and genetic parameters estimation.

43 **Abstract:**

44 Efficient computing techniques allow the estimation of variance components for virtually any  
45 traditional dataset. When genomic information is available, variance components can be  
46 estimated using genomic REML (GREML). If only a portion of the animals have genotypes,  
47 single-step GREML (ssGREML) is the method of choice. The genomic relationship matrix ( $\mathbf{G}$ )  
48 used in both cases is dense, limiting computations depending on the number of genotyped  
49 animals. The algorithm for proven and young (APY) can be used to create a sparse inverse of  $\mathbf{G}$   
50 ( $\mathbf{G}_{APY}^{-1}$ ) with close to linear memory and computing requirements. In ssGREML, the inverse of  
51 the realized relationship matrix ( $\mathbf{H}^{-1}$ ) also includes the inverse of the pedigree relationship  
52 matrix, which can be dense with long pedigree, but sparser with short. The main purpose of this  
53 study was to investigate whether costs of ssGREML can be reduced using APY with truncated  
54 pedigree and phenotypes. We also investigated the impact of truncation on variance components  
55 estimation when different numbers of core animals are used in APY. Simulations included 150K  
56 animals from 10 generations, with selection. Phenotypes ( $h^2 = 0.3$ ) were available for all animals  
57 in generations 1-9. A total of 30K animals in generations 8 and 9, and 15K validation animals in  
58 generation 10 were genotyped for 52,890 SNP. Average information REML and ssGREML with  
59  $\mathbf{G}^{-1}$  and  $\mathbf{G}_{APY}^{-1}$  using 1K, 5K, 9K, and 14K core animals were compared. Variance components  
60 are impacted when the core group in APY represents the number of eigenvalues explaining a

61 small fraction of the total variation in **G**. The most time-consuming operation was the inversion,  
62 with more than 50% of the total time. Next, numerical factorization consumed nearly 30% of the  
63 total computing time. On average, a 7% decrease in the computing time for ordering was  
64 observed by removing each generation of data. APY can be successfully applied to create the  
65 inverse of the genomic relationship matrix used in ssGREML for estimating variance  
66 components. To ensure reliable variance component estimation, it is important to use a core size  
67 that corresponds to the number of largest eigenvalues explaining around 98% of total variation in  
68 **G**. When APY is used, pedigrees can be truncated to increase the sparsity of **H** and slightly  
69 reduce computing time for ordering and symbolic factorization, with no impact on the estimates.

70 **Keywords:** variance components, genomic information, sparse genomic matrix, old data

## 71 **Abbreviations**

|    |                        |                                                   |
|----|------------------------|---------------------------------------------------|
| 72 | <b>A</b>               | pedigree relationship matrix                      |
| 73 | <b>AIREML</b>          | average information restricted maximum likelihood |
| 74 | <b>APY</b>             | algorithm for proven and young                    |
| 75 | <b>BLUP</b>            | best linear unbiased prediction                   |
| 76 | <b>EBV</b>             | estimated breeding value                          |
| 77 | <b>G</b>               | genomic matrix                                    |
| 78 | <b>G<sub>APY</sub></b> | genomic matrix created using APY                  |
| 79 | <b>GEHV</b>            | genomic enhanced breeding value                   |
| 80 | <b>GREML</b>           | genomic restricted maximum likelihood             |
| 81 | <b>IOD</b>             | iteration on data                                 |
| 82 | <b>LHS</b>             | left hand side of mixed model equations           |

|    |                |                                                   |
|----|----------------|---------------------------------------------------|
| 83 | <b>MME</b>     | mixed model equations                             |
| 84 | <b>QTL</b>     | quantitative trait loci                           |
| 85 | <b>REML</b>    | restricted maximum likelihood                     |
| 86 | <b>ssGBLUP</b> | single step genomic BLUP                          |
| 87 | <b>ssGREML</b> | single step genomic restricted maximum likelihood |
| 88 | <b>YAMS</b>    | yet another MME solver                            |

89

90

## Introduction

91           Restricted maximum likelihood (REML), described by Patterson and Thompson (1971),  
92 is a popular method for parameter estimation. Because it uses the mixed model equations  
93 (Henderson, 1975), it is resistant to selection bias, and efficient implementations are currently  
94 available. With the Average Information (AI) algorithm, convergence is often achieved in a few  
95 rounds. With traces obtained by sparse matrix factorization and inversion (Meyer, 1997),  
96 computing variance components is feasible even with large models.

97           When genomic information is available, two versions of REML may be applicable. When  
98 only genotyped animals have phenotypes, genomic REML (GREML) can be applied with a  
99 genomic relationship matrix (**G**). In general, such a matrix is dense, and the cost of dense matrix  
100 operations would limit computations depending on the models. When only a fraction of animals  
101 are genotyped, a single-step genomic REML is applicable (ssGREML). In the latter, the  
102 combined relationship matrix (**H**) has dense blocks due to the genomic information, limiting the  
103 efficiency of sparse matrix operations. Lately, Masuda et al. (2015) developed a sparse matrix  
104 package YAMS that identifies dense blocks and computes them efficiently. For ssGREML, with

105 genomic computation, such a package resulted in up to 100 times speedup, allowing four trait  
106 models with 20,000 genotyped animals (Masuda et al., 2015).

107 In general, it is of interest to include many genotyped animals in parameter estimation  
108 and evaluations to account for genomic selection or pre-selection (Patry and Ducrocq, 2011). For  
109 instance, the greatest reliability in a single-step genomic BLUP was obtained using 50% of the  
110 heritability computed with a non-genomic REML (Misztal et al., 2017). The number of  
111 genotyped animals is increasing fast for some species. As an example, almost 3 million Holsteins  
112 have been genotyped in the US ([https://queries.uscdcb.com/Genotype/cur\\_freq.html](https://queries.uscdcb.com/Genotype/cur_freq.html)). However,  
113 the cost of dense matrix operations with  $\mathbf{G}$  in REML using YAMS is quadratic for memory and  
114 cubic for operations, which limits computations to around 50,000 animals.

115 The genomic information has a limited dimensionality due to the limited effective  
116 population size (Stam, 1980; VanRaden, 2008; Misztal, 2016). Such dimensionality varied from  
117 4,000 in pigs and chickens to 15,000 in Holsteins (Pocrnic et al., 2016c). Assuming limited  
118 dimensionality, the inverse of  $\mathbf{G}$  ( $\mathbf{G}^{-1}$ ) – as needed by REML – can be sparsely constructed using  
119 the APY algorithm, with close to linear memory and computing requirements. Subsequently, the  
120 inverses for over 2 million animals can be computed and stored (Tsuruta et al., 2021). However,  
121 the inverse of  $\mathbf{H}$  also includes the inverse of a pedigree-based relationship matrix for genotyped  
122 animals (Aguilar et al., 2010). Such a matrix can be dense with a long pedigree, but it is sparser  
123 with a shorter pedigree. Thus, it could not be efficiently stored in large populations but had to be  
124 accommodated indirectly (Strandén and Mäntysaari, 2014; Masuda et al., 2017).

125 The first purpose of this study was to find whether the costs of ssGREML can be reduced  
126 using the APY algorithm with truncated pedigree and phenotypes. We hypothesize the truncation  
127 could help to preserve the system's sparsity, given that APY  $\mathbf{G}^{-1}$  is sparser than the inverse of the

128 pedigree relationship matrices for deep pedigrees. The second purpose was to investigate to what  
129 extent such truncation influences variance components and heritability estimates when different  
130 numbers of core animals are used in APY.

131

132

## Material and Methods

133 Animal care and use committee approval was not needed because data were simulated.

134

### 135 Data simulation

136 To evaluate the computational effectiveness of the proposed approach for estimating  
137 variance components using genomic information, we simulated data using the QMSim software  
138 (Sargolzaei et al., 2011). The simulator generated a historical population undergoing drift and  
139 mutation and a recent population undergoing selection. The historical population consisted of  
140 1,000 generations with a constant size of 50,000 individuals. Then, 800 more generations were  
141 simulated where the number of individuals was reduced to 20,000, mimicking a bottleneck event.  
142 The recent population (P1) consisted of 20 males and 15,000 females randomly sampled from  
143 the last historical generation based on high phenotypic values. Individuals were mated along ten  
144 generations producing a litter size of 1 with an equal probability of being male or female,  
145 following a random mating design. Moreover, we considered a sire replacement rate of 0.50 and  
146 a dam replacement rate of 0.20. Genomic information was available for 45,000 animals from  
147 generations 8 through 10 (three youngest generations).

148 A total of 29 chromosomes of different lengths (ranging from 40 to 146 cM) were  
149 simulated. Biallelic markers ( $n = 52,890$ ) were evenly spaced along the chromosomes with equal

150 frequency in the first generation of the historical population. Potentially, 1,242 quantitative trait  
151 loci (QTL) affected the trait and explained all the additive genetic variation; QTL allele effects  
152 were sampled from a Gamma distribution with a shape parameter of 0.4. The mutation rate for  
153 markers (recurrent mutation) and QTL was assumed to be equal to  $2.5 \times 10^{-5}$  per locus per  
154 generation (Solberg et al., 2008).

155 The simulated trait had phenotypic variance and mean of 1.0, heritability and QTL  
156 heritability of 0.30, and residual variance of 0.70. The simulated phenotypes were composed of:

$$157 \quad \mathbf{y} = \boldsymbol{\mu} + \mathbf{u} + \mathbf{e}$$

158 where  $\mathbf{y}$  is the vector of phenotypes,  $\boldsymbol{\mu}$  is the vector of overall mean,  $\mathbf{u}$  is the vector of weighted  
159 sum of QTL effects (i.e., additive genetic effect or animal effect),  $\mathbf{e}$  is the vector of residuals.

160 The standard error of estimates was small using 5 replicates during preliminary investigations of  
161 this study. Because of that, the results are based on one replicate.

162

### 163 **Variance components**

164

165 Variance components were estimated using the average information (AI) REML  
166 algorithm as implemented in the AIREMLF90 software (Misztal et al., 2002), which was  
167 modified to incorporate the YAMS package (Masuda et al., 2014; Masuda et al., 2015). The  
168 incorporation of YAMS was essential for this kind of task when using genomic information. The  
169 package applies the supernodal method using multi-core optimized libraries (i.e., parallel  
170 computing). The most computationally expensive part of the variance component estimation is  
171 obtaining the inverse of the coefficient matrix used in traces. To that, efficient algorithms are  
172 used to invert large and sparse matrices, which are based on three steps (i) ordering, (ii)



173 factorization (i.e., symbolic and numerical), and (iii) sparse inversion. Ordering is not  
174 mandatory, but it saves a large amount of memory and time in the factorization step as it reduces  
175 the *fill-in* effect (zero elements in the original matrix could become nonzero elements in the  
176 factorized matrix). This effect can be minimized by ordering using appropriate techniques. In the  
177 next step, the coefficient matrix (LHS of the mixed model equations) is factorized into two  
178 triangular matrices by LU decomposition – L matrix. Finally, the Takahashi algorithm can be  
179 used for inversion. The supernodal method is expected to provide faster inversions because they  
180 find and process dense blocks in sparse matrices. Note that LHS inversion is only required to  
181 estimate variance components or compute prediction error variance (PEV, obtained from  
182 diagonal elements of an inverted LHS). If the objective is to solve the system of equations to  
183 obtain breeding values, iterative methods as the preconditioned conjugate gradient (Lidauer et  
184 al., 1999; Tsuruta et al., 2001) can be efficiently applied.

185         The model used to estimate variance components was based on the single-step method, in  
186 which the inverse of the realized relationship matrix ( $\mathbf{H}^{-1}$ ) is used in the mixed model equations  
187 instead of  $\mathbf{A}^{-1}$ . Single-step genomic BLUP (ssGBLUP) is used for breeding value estimation,  
188 whereas ssGREML is used for variance components estimation. The inversion of  $\mathbf{H}$  is computed  
189 as follows (Aguilar et al., 2010):

190

$$191 \quad \mathbf{H}^{-1} = \mathbf{A}^{-1} + \begin{bmatrix} 0 & 0 \\ 0 & \mathbf{G}_{APY}^{-1} - \mathbf{A}_{22}^{-1} \end{bmatrix}$$

192

193 where  $\mathbf{A}^{-1}$  is the inverse of the pedigree relationship matrix,  $\mathbf{A}_{22}^{-1}$  is the inverse of the pedigree  
194 relationship matrix for genotyped animals, computed by the algorithm described in Colleau  
195 (2002). The genomic relationship matrix ( $\mathbf{G}$ ) was computed as follows:

196

197

$$\mathbf{G} = \frac{\mathbf{Z}\mathbf{Z}'}{2 \sum p_j(1 - p_j)}$$

198

199 where  $\mathbf{Z}$  is the matrix of gene content centered by the current allele frequencies, and  $p_j$  is the  
 200 allele frequency of SNP  $j$ . Inbreeding coefficients were considered when constructing the three  
 201 relationship matrices. This provides a better equivalence between genomic and pedigree-based  
 202 relationship matrices, leading to a more similar genetic base (Aguilar et al., 2020). The  $\mathbf{G}_{\text{APY}}^{-1}$  is  
 203 the inverse of the genomic relationship matrix obtained using the algorithm for proven and  
 204 young (APY) (Misztal et al., 2014; Misztal, 2016). This algorithm considers that genotyped  
 205 individuals are arbitrarily divided into core ( $c$ ) and noncore ( $n$ ). Breeding values for noncore  
 206 ( $\mathbf{u}_n$ ) can be described as a linear function of breeding values of core ( $\mathbf{u}_c$ ):

207

208

$$\mathbf{u}_n = \mathbf{P}_n \mathbf{u}_c + \Phi_n$$

209

210 where  $\mathbf{P}_n = \mathbf{Z}_n(\mathbf{Z}'_c \mathbf{Z}_c + \mathbf{I}\alpha)^{-1} \mathbf{Z}'_c$  is a matrix that relates breeding values of noncore and core,  
 211 and  $\Phi_n$  is the mendelian sampling term which has non-diagonal variance but can be  
 212 approximated to diagonal. In cases where the number of core is large enough, breeding values of  
 213 noncore depend only on breeding values of core (see Misztal (2016) for additional details). The  
 214 inverse of  $\mathbf{G}_{\text{APY}}$  is constructed as following:

215

216

$$\mathbf{G}_{\text{APY}}^{-1} = \begin{bmatrix} \mathbf{I} - \mathbf{P}'_{cc} & -\mathbf{P}_{cn} \\ \mathbf{0} & \mathbf{I} \end{bmatrix} \begin{bmatrix} \mathbf{M}_{cc}^{-1} & \mathbf{0} \\ \mathbf{0} & \mathbf{M}_{nn}^{-1} \end{bmatrix} \begin{bmatrix} \mathbf{I} - \mathbf{P}_{cc} & \mathbf{0} \\ -\mathbf{P}_{nc} & \mathbf{I} \end{bmatrix}$$

217

218 If  $\mathbf{G}_{cc}^{-1} = (\mathbf{I} - \mathbf{P}'_{cc})\mathbf{M}_{cc}^{-1}(\mathbf{I} - \mathbf{P}_{cc})$  is known, the complete inverse can be simplified to:

219

$$220 \quad \mathbf{G}_{APY}^{-1} = \begin{bmatrix} \mathbf{G}_{cc}^{-1} & \mathbf{0} \\ \mathbf{0} & \mathbf{0} \end{bmatrix} + \begin{bmatrix} -\mathbf{P}_{cn} \\ \mathbf{I} \end{bmatrix} \mathbf{M}_{nn}^{-1} \begin{bmatrix} -\mathbf{P}_{nc} & \mathbf{I} \end{bmatrix}$$

221

222 where  $\mathbf{P}_{cc} = \mathbf{G}_{cc}\mathbf{G}_{cc}^{-1}$ ,  $\mathbf{M}_{cc(nn)} = \text{diag}\{g_{i,i} - p_{i,1:i-1}g'_{i,1:i-1}\}$  for individual  $i$  in the core

223 (noncore) group. Because  $\mathbf{G}_{APY}^{-1}$  is conditioned only on the genotypic information of core

224 animals, the matrix is sparser than the full  $\mathbf{G}^{-1}$  regularly used in ssGBLUP (Misztal, 2016). Note

225 that the covariance between two noncore individuals is null, but variances are stored in the

226 matrix.

227 The construction of the genomic matrix using APY in BLUPF90 software can be done in

228 two possible implementations. The first construction builds a single matrix for all core and

229 noncore. The second construction builds the genomic matrix in blocks and it aims to save

230 computing memory as it require less operations than single matrix (Masuda et al., 2016).

231 Currently, the single matrix construction is implemented for variance component estimation.

232

## 233 **Scenarios**

234

235 The scenarios below were built to evaluate the impact of the (1) size of the core group in

236 APY and the (2) influence of skipping zero elements from the LHS under different amounts of

237 pedigree and phenotypic data used in variance components estimation.

238

239 *Core group of different sizes*

240

241 Pocrnic et al. (2016a) evaluated the prediction accuracy using APY in simulation tests.  
242 The authors suggested the greatest accuracy was found by selecting the number of core  
243 individuals equal to the number of largest eigenvalues explaining 98% of  $\mathbf{G}$  (a number from now  
244 on referred to as eigen98). This study tested core groups of different sizes to evaluate the impact  
245 on variance components and heritability estimates. A total of four scenarios were tested by  
246 allocating 1K (one thousand), 5K, 9K, and 14K randomly sampled out of 45,000 genotyped  
247 individuals. For each of those scenarios, the largest variation explained was 72.03% (eigen70),  
248 91.09% (eigen90), 95.70% (eigen95), and 98.07% (eigen98), respectively. For computational  
249 reasons, the singular value decomposition of  $\mathbf{Z}$  was calculated instead of the eigenvalue  
250 decomposition of  $\mathbf{G}$ .

251

### 252 *Evaluating the influence of pedigrees and phenotypes*

253

254 Using  $\mathbf{G}_{\text{APY}}^{-1}$  helps to reduce computing time for genomic predictions because of its  
255 sparsity (Fragomeni et al., 2015; Masuda et al., 2016); however, in the single-step approach, the  
256 combined  $\mathbf{H}^{-1}$  contains also  $\mathbf{A}^{-1}$  and  $\mathbf{A}_{22}^{-1}$ , which are relatively dense. The APY method was  
257 earlier applied to the construction of  $\mathbf{A}_{22}^{-1}$  without success (Breno Fragomeni, personal  
258 communication). Although the sparsity of  $\mathbf{A}_{22}^{-1}$  may not be a requirement for genomic  
259 predictions, it becomes essential for reducing computing time for variance components  
260 estimation to follow the sparsity of  $\mathbf{G}_{\text{APY}}^{-1}$ . A reduction in the number of generations was  
261 attempted to increase the sparsity in  $\mathbf{A}^{-1}$  and  $\mathbf{A}_{22}^{-1}$ . A total of seven different scenarios were  
262 designed, differing on the number of pedigree generations used for variance components  
263 estimation. Reduction in the generations of phenotypes was also used to follow pedigree

264 incompleteness and avoid bias. The scenarios were designed to mimic a real situation where the  
265 actual founder population is usually unknown. Only three genotyped generations (45,000 most  
266 recent animals) were kept in the genomic file for further analyses. Subsequent scenarios were  
267 constructed by removing one generation of phenotypes and pedigree at a time, from the oldest to  
268 the youngest animals.

269

270 *The influence of zero elements in the Mixed Model Equations (MME)*

271

272 Lastly, a scenario aimed to evaluate the impact of discarding zero elements from the LHS  
273 of MME on computing performance and variance components estimation. For that, the *OPTION*  
274 *skip\_zero\_in\_dense\_matrix* was used in AIREMLF90 (Misztal et al., 2014) to store only non-  
275 zero elements of  $\mathbf{G}_{APY}^{-1} - \mathbf{A}_{22}^{-1}$ . When this option was used, the scenario was termed “Reduced”,  
276 and otherwise “Full”.

277

## 278 RESULTS AND DISCUSSION

279 Previous studies have investigated the properties of APY, including its implementation  
280 for large-scale genomic evaluations (Fragomeni et al., 2015; Lourenco et al., 2015; Masuda et  
281 al., 2016) and its efficiency in real and simulated populations with different effective population  
282 sizes (Pocrnic et al., 2016b; Pocrnic et al., 2016c). Bradford et al. (2017) studied the impact of  
283 different core definitions, and Misztal et al. (2020) evaluated the GEBV fluctuation when  
284 changing the core group in APY. Additionally, Vandenplas et al. (2018) investigated the impact  
285 of using APY on GEBV estimation in crossbreeding schemes; Hidalgo et al. (2021) compared

286 the GEBV variation due to the inclusion of new data and changing the APY core animals.  
287 Finally, Lourenco et al. (2018) studied the impact of using  $\mathbf{G}_{\text{APY}}^{-1}$  instead of  $\mathbf{G}^{-1}$  on the estimation  
288 of SNP effects. Our study evaluated the feasibility of using APY for variance components  
289 estimation, the impact of removing generations of pedigree and phenotypic data on computing  
290 time, and the influence of using a different number of core animals to construct the genomic  
291 matrix. Variance components were estimated using AIREML modified to incorporate the YAMS  
292 package for sparse matrix calculations (Masuda et al., 2014).

293

## 294 **Heritability estimates and computing performance**

295

296 Heritability, residual variance, and additive variance estimated using a different number  
297 of generations in the pedigree and cores sizes in APY are shown in Figures 1-3. The standard  
298 deviation of variance components and heritability across generations is shown in Table 1.  
299 Because the simulation involved a certain level of selection, the expected heritability should  
300 slightly deviate from the simulated value of 0.3. Therefore, the scenario with 10 generations of  
301 data (i.e., full pedigree and full phenotypes) was used as a benchmark.

302 In general, the variance components and heritability estimates approached the simulated  
303 values as the number of core approached eigen98. The scenario using 1K individuals (i.e.,  
304 eigen70) in the core was the most sensitive to removing generations, suggesting that variance  
305 components are highly impacted when the core group in APY represents the number of  
306 eigenvalues explaining a smaller fraction of the total variation in  $\mathbf{G}$ . From a prediction accuracy  
307 standpoint, a similar behavior was also observed in other studies (Pocrnic et al., 2016a; Pocrnic  
308 et al., 2016c); however, the impact on variance components had not been investigated before.

309 Although pedigrees were more limited after removing a few generations of data, the combination  
310 of pedigree and genomic information and the use of a proper core size controlled the bias in  
311 variance components and heritability estimation. Small fluctuations on variance components and  
312 heritability were observed when retaining only 4 to 6 generations of pedigree and phenotypes  
313 with a core size equal to eigen98. In these scenarios, the difference in heritability was almost  
314 nonexistent; this was also true when comparing Full and Reduced models.

315 The ratio  $\sigma_e^2/\sigma_a^2$  is important when predicting breeding values using the mixed model  
316 equations as it is the shrinkage factor for additive effects. The variability of the ratio under  
317 different core sizes is shown in Figure 4. As the core size approached eigen98, the ratio became  
318 closer to the simulated value of 2.33. Additionally, the ratio became less influenced by the  
319 number of generations used to estimate the variance components as the core size approached  
320 eigen98. Reliable variance components estimates (or at least their ratio and heritability) are of  
321 great importance to ensure the accurate prediction of breeding values. The resulting breeding  
322 values are not BLUP unless the true variances are known or are approaching the true parameters  
323 (Kennedy, 1981).

324 The adoption of a core group that explains less than eigen98 affected the ability to  
325 represent all the independent chromosome segments segregating in the population, traceback  
326 gene frequencies, and consequently, accurately establish covariances between genotypic values.  
327 In this study, we might have three different sources of changes for genetic variances. The first  
328 source is related to the lack of relationships because generations were sequentially removed in  
329 different scenarios. Unknown relationships (i.e., incorrect base population definition) affect the  
330 estimation of Mendelian sampling variance in different intensities depending on the number of  
331 known parents. If both parents are unknown, Mendelian sampling is equal to  $0.5\sigma_a^2$ , and if only

332 one parent is known, it equals  $[0.75 - 0.25 \times f_p] \sigma_a^2$ , where  $f_p$  is the inbreeding coefficient  
333 (Henderson, 1976). Under mixed models, offspring breeding values are estimated as a function  
334 of parent breeding values and Mendelian sampling. Thus, all individuals with unknown  
335 relationships are treated as samples from the base population with average breeding value of 0  
336 and common variance  $\sigma_a^2$ .

337 The second source of change in genetic variance is the presence of selection over  
338 generations, which affects the distribution of sire and dam breeding values. Unfortunately, it is  
339 impossible to identify the contribution of each factor separately because this study was not  
340 designed for that purpose. The third source of genetic variation, which is the aim of this study, is  
341 the intentional use of a sparse representation of  $\mathbf{G}^{-1}$ , i.e.,  $\mathbf{G}_{APY}^{-1}$ . In APY, it is intrinsically  
342 assumed that the complete genome is divided into many independent chromosome segments  
343 (ICS) containing non-redundant genomic information. The number of ICS is a statistical concept  
344 that depends on the effective population size and the genome length (Stam, 1980). The  
345 consequence of this assumption is that a small error in variance components estimation can be  
346 observed by building the core group considering the dimensionality of  $\mathbf{G}$  as a function of the  
347 number of eigenvalues explaining a certain proportion of variance. For example, if  $\mathbf{G}_{APY}^{-1}$  is built  
348 based on the number of core animals equal to that of eigenvalues explaining 98% of the variance  
349 in  $\mathbf{G}$ , the assumed error is 2% (Miształ et al., 2020). Results from the current study add a new  
350 dimension to the factors driving the estimation of reliable variance components in the genomic  
351 era. Thus, if the definition of the core group considers the genetic architecture of the population,  
352  $\mathbf{G}$  might contain all the genetic information necessary to estimate reliable variance components  
353 (Junqueira et al., 2017; Junqueira et al., 2020). In addition to the factors evaluated in this study,



354 Cesarani et al. (2019) have found that the selection design and genotyping structure can  
355 influence bias in estimating variance components.

356

### 357 **Computing resources**

358

359         Nowadays, much effort has been placed on developing faster and computationally  
360 feasible methods for a virtually unlimited number of genotyped individuals. Using large-scale  
361 datasets becomes more problematic when the objective is to estimate variance components. This  
362 is because most algorithms require several rounds of inversion of the LHS of MME before the  
363 convergence is reached. During computations, factorization and inversion are the most  
364 demanding steps in the REML estimation. The possibility to combine APY to compute a sparse  
365 representation of  $\mathbf{G}^{-1}$ , data reduction, and YAMS (i.e., dense blocks operation) (Masuda et al.,  
366 2014; Masuda et al., 2015) seems computationally beneficial. In this study, we evaluated the  
367 factors impacting the timing required for computational operations. Figure 5 shows the average  
368 computing time, relative to total (i.e., in percentage), required for ordering, factorization  
369 (symbolic and numerical), and sparse inversion with data reduction (pedigree and phenotypes).  
370 The most time-consuming operation was the inversion, which took more than 50% of the total  
371 time. This was expected because matrix inversion has a cubic computing cost. Next, numerical  
372 factorization consumed nearly 30% of the total computing time, whereas ordering and symbolic  
373 factorization took approximately 9% and 7.5%, respectively. Skipping zero elements in the  
374 MME did not improve the computing time of any of the inverse operations.

375         A detailed description of the computing time required by each step after data removal is  
376 in Figure 6. The descriptive statistics of computing time savings across generations is shown in

377 Table 2. Ordering showed the most prominent timing decrease due to data removal, followed by  
378 symbolic factorization among the four steps. On average, a 7% decrease in the computing time  
379 for ordering was observed by removing each generation of data. During MME computations,  
380 ordering and symbolic factorization are not mandatory. These operations are mainly  
381 implemented to reduce computing time for numerical factorization and inversion. As more  
382 genotypes and/or pedigree records are included in the model, the time required for numerical  
383 factorization and sparse inversion increases. Using a simulated dataset with  $\mathbf{G}_{APY}^{-1}$  and YAMS,  
384 we observed an opposite behavior where shorter pedigree sometimes caused an increase in  
385 computing time for the numerical factorization and sparse inversion operations. In these  
386 operations, there were no gains in computing performance due to data removal, as shown by the  
387 regression slope, which was close to 0 (Table 2). The greatest savings were around 10% when  
388 using six generations of pedigree and phenotypic data. It is known that numerical factorization  
389 and sparse inversion are the most demanding operations in REML computations. The fact that  
390 the required time for these operations was not reduced can be explained by the creation of  
391 nonzero elements not present in the coefficient matrix before the numerical factorization is done.  
392 Those elements are known as “fill-in elements.”

393         Consequently, extra calculations are needed, obviously increasing the amount of time to  
394 complete the sparse inversion. There are several efforts in developing faster algorithms focused  
395 on typical nonzero structures in sparse matrices. The sparse matrix algorithm in YAMS uses  
396 supernodal techniques (i.e., common nonzero pattern between adjacent columns) to speed-up  
397 computations. Computing time might be significantly improved compared to other sparse matrix  
398 packages (e.g., FSPAK) because the memory hierarchy is more effectively exploited in dense

399 operations, and multiple columns within a submatrix are simultaneously updated (Masuda et al.,  
400 2014).

## 401 **Conclusions**

402 The algorithm for proven and young (APY) can be successfully applied to create the  
403 inverse of the genomic relationship matrix used in single-step genomic restricted maximum  
404 likelihood for estimating variance components. To ensure reliable variance component  
405 estimation, it is important to use a core size that corresponds to the number of largest eigenvalues  
406 explaining around 98% of total variation in  $\mathbf{G}$ . When APY is used, pedigrees can be truncated to  
407 increase the sparsity of  $\mathbf{H}$  and slightly reduce computing time for ordering and symbolic  
408 factorization, with no impact on the estimates. A reduction in computing time for numerical  
409 factorization and sparse inversion is unlike because of fill-in elements. The savings in  
410 computing time for estimating variance components is far less than the expected efficiency that  
411 APY has shown compared to the use of regular  $\mathbf{G}^{-1}$  for breeding values estimation. This  
412 inefficiency is because the block implementation of APY is still not possible for variance  
413 components estimation.

414

## 415 **Conflict of interest statement**

416 The authors declare that they do not have any conflict of interest.

417

## 418 **Literature Cited**

- 419 Aguilar, I., E. N. Fernandez, A. Blasco, O. Ravagnolo, and A. Legarra. 2020. Effects of ignoring  
420 inbreeding in model-based accuracy for BLUP and SSGBLUP. *Journal of Animal*  
421 *Breeding and Genetics* 137(4):356-364.
- 422 Aguilar, I., I. Misztal, D. L. Johnson, A. Legarra, S. Tsuruta, and T. J. Lawlor. 2010. Hot topic:  
423 A unified approach to utilize phenotypic, full pedigree, and genomic information for  
424 genetic evaluation of Holstein final score. *Journal of Dairy Science* 93(2):743-752. doi:  
425 10.3168/jds.2009-2730
- 426 Bradford, H., I. Pocnić, B. Fragomeni, D. Lourenco, and I. Misztal. 2017. Selection of core  
427 animals in the algorithm for proven and young using a simulation model. *Journal of*  
428 *Animal Breeding and Genetics* 134(6):545-552.
- 429 Cesarani, A., G. Gaspa, F. Correddu, M. Cellesi, C. Dimauro, and N. Macciotta. 2019. Genomic  
430 selection of milk fatty acid composition in Sarda dairy sheep: Effect of different  
431 phenotypes and relationship matrices on heritability and breeding value accuracy. *Journal*  
432 *of Dairy Science* 102(4):3189-3203.
- 433 Colleau, J. J. 2002. An indirect approach to the extensive calculation of relationship coefficients.  
434 *Genetics Selection Evolution* 34(4):409.
- 435 Fragomeni, B. O., D. A. L. Lourenco, S. Tsuruta, Y. Masuda, I. Aguilar, A. Legarra, T. J.  
436 Lawlor, and I. Misztal. 2015. Hot topic: Use of genomic recursions in single-step  
437 genomic best linear unbiased predictor (BLUP) with a large number of genotypes.  
438 *Journal of Dairy Science* 98(6):4090-4094. doi: 10.3168/jds.2014-9125
- 439 Henderson, C. R. 1975. Best linear unbiased estimation and prediction under a selection model.  
440 *Biometrics*:423-447.
- 441 Henderson, C. R. 1976. A simple method for computing the inverse of a numerator relationship  
442 matrix used in prediction of breeding values. *Biometrics*:69-83.
- 443 Hidalgo, J., D. Lourenco, S. Tsuruta, Y. Masuda, S. Miller, M. Bermann, A. L. Garcia, and I.  
444 Misztal. 2021. Changes in genomic predictions when new information is added. *Journal*  
445 *of Animal Science* 99(2):skab004.
- 446 Junqueira, V. S., F. F. Cardoso, M. M. Oliveira, B. P. Sollero, F. F. Silva, and P. S. Lopes. 2017.  
447 Use of molecular markers to improve relationship information in the genetic evaluation  
448 of beef cattle tick resistance under pedigree-based models. *Journal of Animal Breeding*  
449 *and Genetics* 134(1):14-26.
- 450 Junqueira, V. S., P. S. Lopes, D. Lourenco, F. F. e Silva, and F. F. Cardoso. 2020. Applying the  
451 metafounders approach for genomic evaluation in a multibreed beef cattle population.  
452 *Frontiers in Genetics* 11
- 453 Kennedy, B. 1981. Variance component estimation and prediction of breeding values. *Canadian*  
454 *Journal of Genetics and Cytology* 23(4):565-578.

- 455 Lidauer, M., I. Strandén, E. A. Mäntysaari, J. Pösö, and A. Kettunen. 1999. Solving large test-  
456 day models by iteration on data and preconditioned conjugate gradient. *J. Dairy Sci.*  
457 82(12):2788-2796.
- 458 Lourenco, D. A., B. O. Fragomeni, S. Tsuruta, I. Aguilar, B. Zumbach, R. J. Hawken, A.  
459 Legarra, and I. Misztal. 2015. Accuracy of estimated breeding values with genomic  
460 information on males, females, or both: an example on broiler chicken. *Genetics*  
461 *Selection Evolution* 47(1):56.
- 462 Lourenco, D. A. L., A. Legarra, S. Tsuruta, D. Moser, S. Miller, and I. Misztal. 2018. Tuning  
463 indirect predictions based on SNP effects from single-step GBLUP. *Interbull Bulletin*  
464 (53)
- 465 Masuda, Y., I. Aguilar, S. Tsuruta, and I. Misztal. 2015. Technical note: Acceleration of sparse  
466 operations for average-information REML analyses with supernodal methods and sparse-  
467 storage refinements. *Journal of Animal Science* 93(10):4670-4674.
- 468 Masuda, Y., T. Baba, and M. Suzuki. 2014. Application of supernodal sparse factorization and  
469 inversion to the estimation of (co) variance components by residual maximum likelihood.  
470 *Journal of Animal Breeding and Genetics* 131(3):227-236.
- 471 Masuda, Y., I. Misztal, A. Legarra, S. Tsuruta, D. A. L. Lourenco, B. O. Fragomeni, and I.  
472 Aguilar. 2017. Avoiding the direct inversion of the numerator relationship matrix for  
473 genotyped animals in single-step genomic best linear unbiased prediction solved with the  
474 preconditioned conjugate gradient. *Journal of Animal Science* 95(1):49-52.
- 475 Masuda, Y., I. Misztal, S. Tsuruta, A. Legarra, I. Aguilar, D. A. L. Lourenco, B. O. Fragomeni,  
476 and T. J. Lawlor. 2016. Implementation of genomic recursions in single-step genomic  
477 best linear unbiased predictor for US Holsteins with a large number of genotyped  
478 animals. *Journal of Dairy Science* 99(3):1968-1974.
- 479 Meyer, K. 1997. An average information restricted maximum likelihood algorithm for estimating  
480 reduced rank genetic covariance matrices or covariance functions for animal models with  
481 equal design matrices. *Genetics Selection Evolution* 29(2):97.
- 482 Misztal, I. 2016. Inexpensive computation of the inverse of the genomic relationship matrix in  
483 populations with small effective population size. *Genetics* 202(2):401-409.
- 484 Misztal, I., H. L. Bradford, D. A. L. Lourenco, S. Tsuruta, Y. Masuda, A. Legarra, and T. J.  
485 Lawlor. 2017. Studies on inflation of GEBV in single-step GBLUP for type. *Interbull*  
486 *Bulletin* (51):38-42.
- 487 Misztal, I., A. Legarra, and I. Aguilar. 2014. Using recursion to compute the inverse of the  
488 genomic relationship matrix. *Journal of Dairy Science* 97(6):3943-3952.
- 489 Misztal, I., S. Tsuruta, I. Pocrnic, and D. Lourenco. 2020. Core-dependent changes in genomic  
490 predictions using the algorithm for proven and young in single-step genomic best linear  
491 unbiased prediction. *Journal of Animal Science* 98(12):skaa374.

- 492 Misztal, I., S. Tsuruta, T. Strabel, B. Auvray, T. Druet, and D. H. Lee. 2002. BLUPF90 and  
493 related programs. In: Proceedings of the 7th World Congress on Genetics Applied to  
494 Livestock Production
- 495 Patry, C., and V. Ducrocq. 2011. Evidence of biases in genetic evaluations due to genomic  
496 preselection in dairy cattle. *Journal of Dairy Science* 94(2):1011-1020.
- 497 Patterson, H. D., and R. Thompson. 1971. Recovery of inter-block information when block sizes  
498 are unequal. *Biometrika* 58(3):545-554.
- 499 Pocrnic, I., D. A. Lourenco, Y. Masuda, A. Legarra, and I. Misztal. 2016a. The dimensionality of  
500 genomic information and its effect on genomic prediction. *Genetics* 203(1):573-581.
- 501 Pocrnic, I., D. A. L. Lourenco, Y. Masuda, A. Legarra, and I. Misztal. 2016b. The  
502 dimensionality of genomic information and its effect on genomic prediction. *Genetics*  
503 203(1):573-581.
- 504 Pocrnic, I., D. A. L. Lourenco, Y. Masuda, and I. Misztal. 2016c. Dimensionality of genomic  
505 information and performance of the Algorithm for Proven and Young for different  
506 livestock species. *Genetics Selection Evolution* 48(1):82.
- 507 Sargolzaei, M., J. Chesnais, and F. Schenkel. 2011. FImpute-An efficient imputation algorithm  
508 for dairy cattle populations. *Journal of Dairy Science* 94(1):421.
- 509 Solberg, T., A. Sonesson, J. Woolliams, and T. Meuwissen. 2008. Genomic selection using  
510 different marker types and densities. *Journal of Animal Science* 86(10):2447-2454.
- 511 Stam, P. 1980. The distribution of the fraction of the genome identical by descent in finite  
512 random mating populations. *Genetics Research* 35(2):131-155.
- 513 Strandén, I., and E. A. Mäntysaari. 2014. Comparison of some equivalent equations to solve  
514 single-step GBLUP. In: Proceedings of the 10th World Congress on genetics applied to  
515 Livestock production. Vancouver. p 22.
- 516 Tsuruta, S., T. Lawlor, D. Lourenco, and I. Misztal. 2021. Bias in genomic predictions by mating  
517 practices for linear type traits in a large-scale genomic evaluation. *Journal of Dairy*  
518 *Science* 104(1):662-677.
- 519 Tsuruta, S., I. Misztal, and I. Strandén. 2001. Use of the preconditioned conjugate gradient  
520 algorithm as a generic solver for mixed-model equations in animal breeding applications.  
521 *J. Anim. Sci.* 79(5):1166-1172.
- 522 Vandenplas, J., M. P. Calus, and J. Ten Napel. 2018. Sparse single-step genomic BLUP in  
523 crossbreeding schemes. *Journal of Animal Science* 96(6):2060-2073.
- 524 VanRaden, P. M. 2008. Efficient methods to compute genomic predictions. *Journal of Dairy*  
525 *Science* 91(11):4414-4423.  
526

527  
528

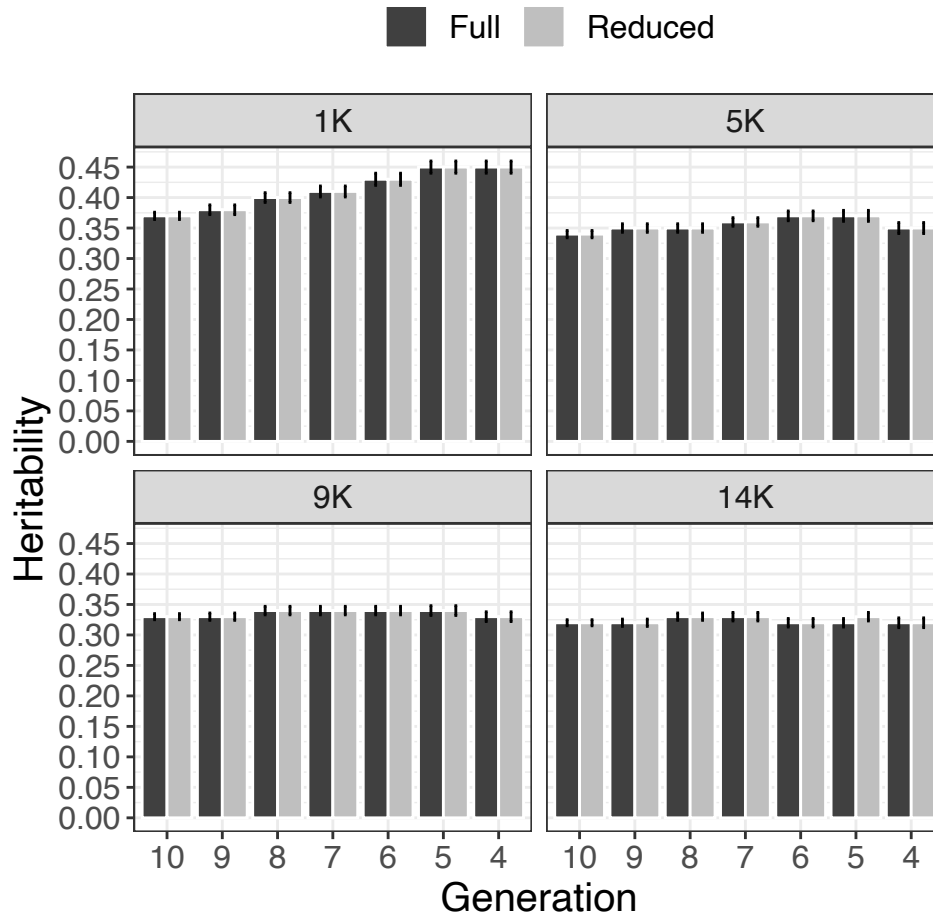

529  
530  
531  
532  
533

**Figure 1.** Heritability calculated along one replicate of simulation considering different number of generations with pedigree and phenotypic data under different number of core animal in APY. Two scenarios were considered, where zeros were stored (Full) or not (Reduced). Error bars represent the standard error of prediction under REML.

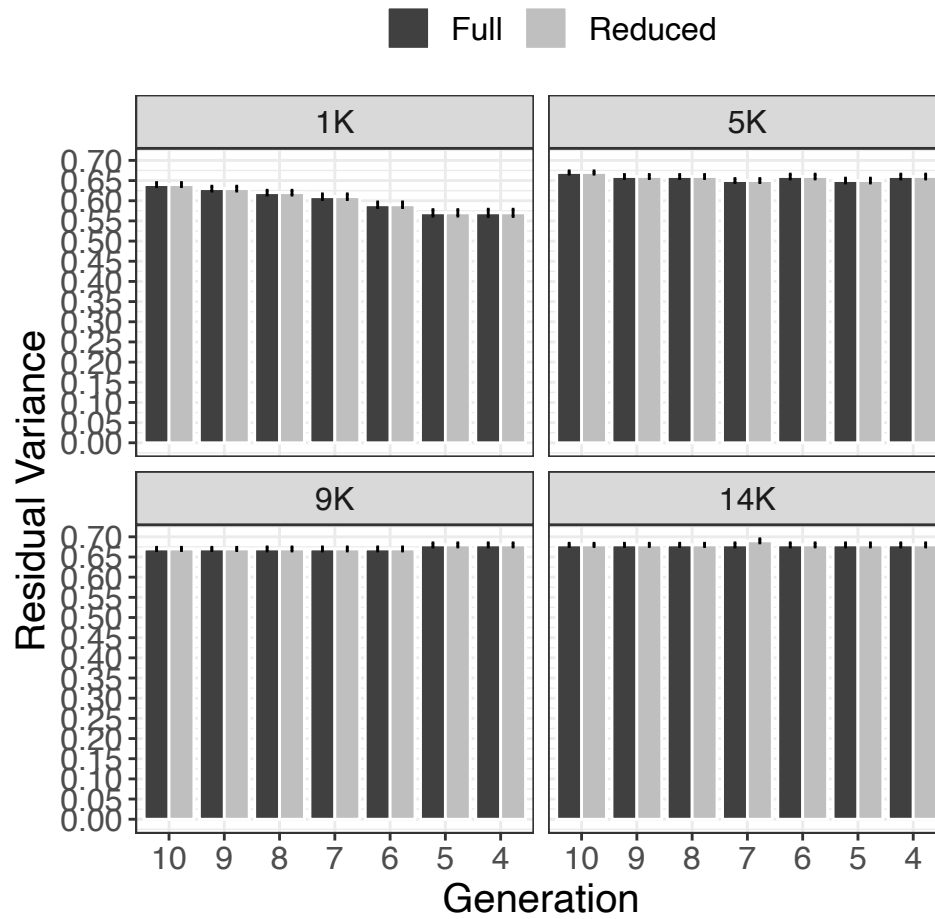

534  
535  
536  
537  
538  
539  
540  
541

**Figure 2.** Residual variance calculated along one replicate of simulation considering different number of generations with pedigree and phenotypic data under different number of core animal for APY calculation. Two scenarios were considered, where zeros were stored (Full) or not (Reduced). Error bars represent the standard error of prediction under REML.



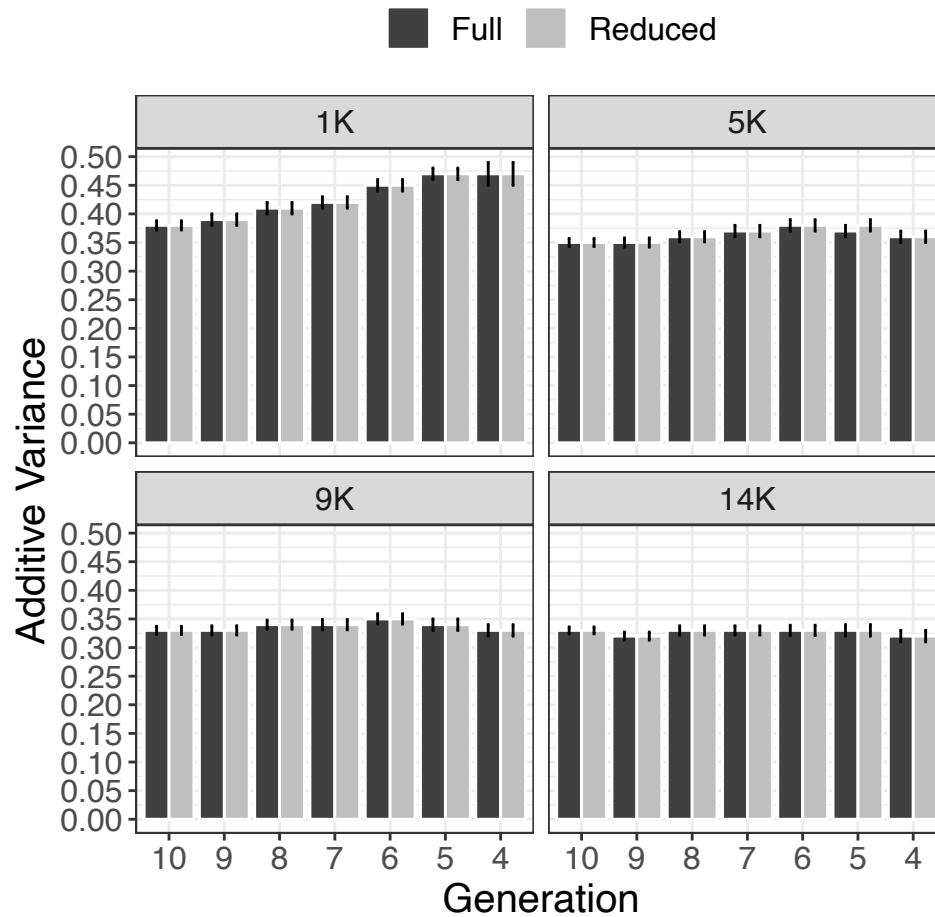

542  
543  
544  
545  
546  
547  
548  
549

**Figure 3.** Additive variance calculated along one replicate of simulation considering different number of generations with pedigree and phenotypic data under different number of core animal in APY. Two scenarios were considered, where zeros were stored (Full) or not (Reduced). Error bars represent the standard error of prediction under REML.

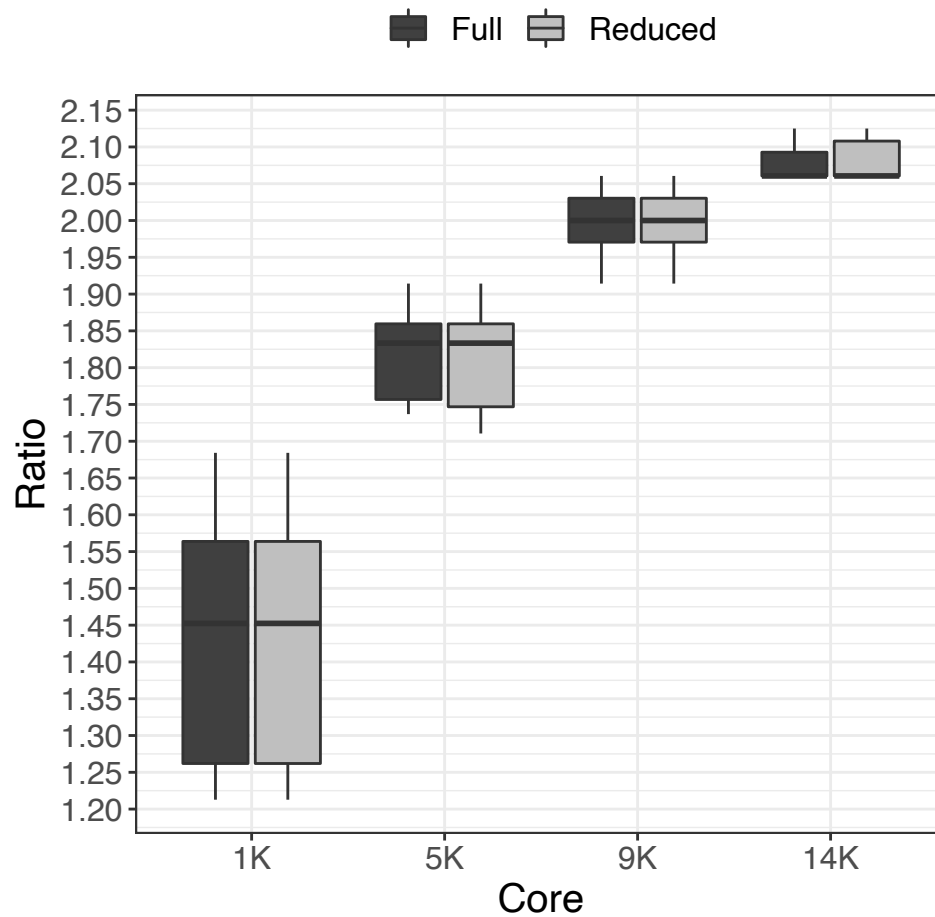

550  
551  
552  
553  
554  
555  
556

**Figure 4.** Distribution of the ratio ( $\sigma_e^2 / \sigma_a^2$ ) over different number of generations with pedigree and phenotypic data using different sizes for the core group in APY. Two scenarios were considered, where zeros were stored (Full) or not (Reduced). Error bars represents the standard error of prediction under REML.

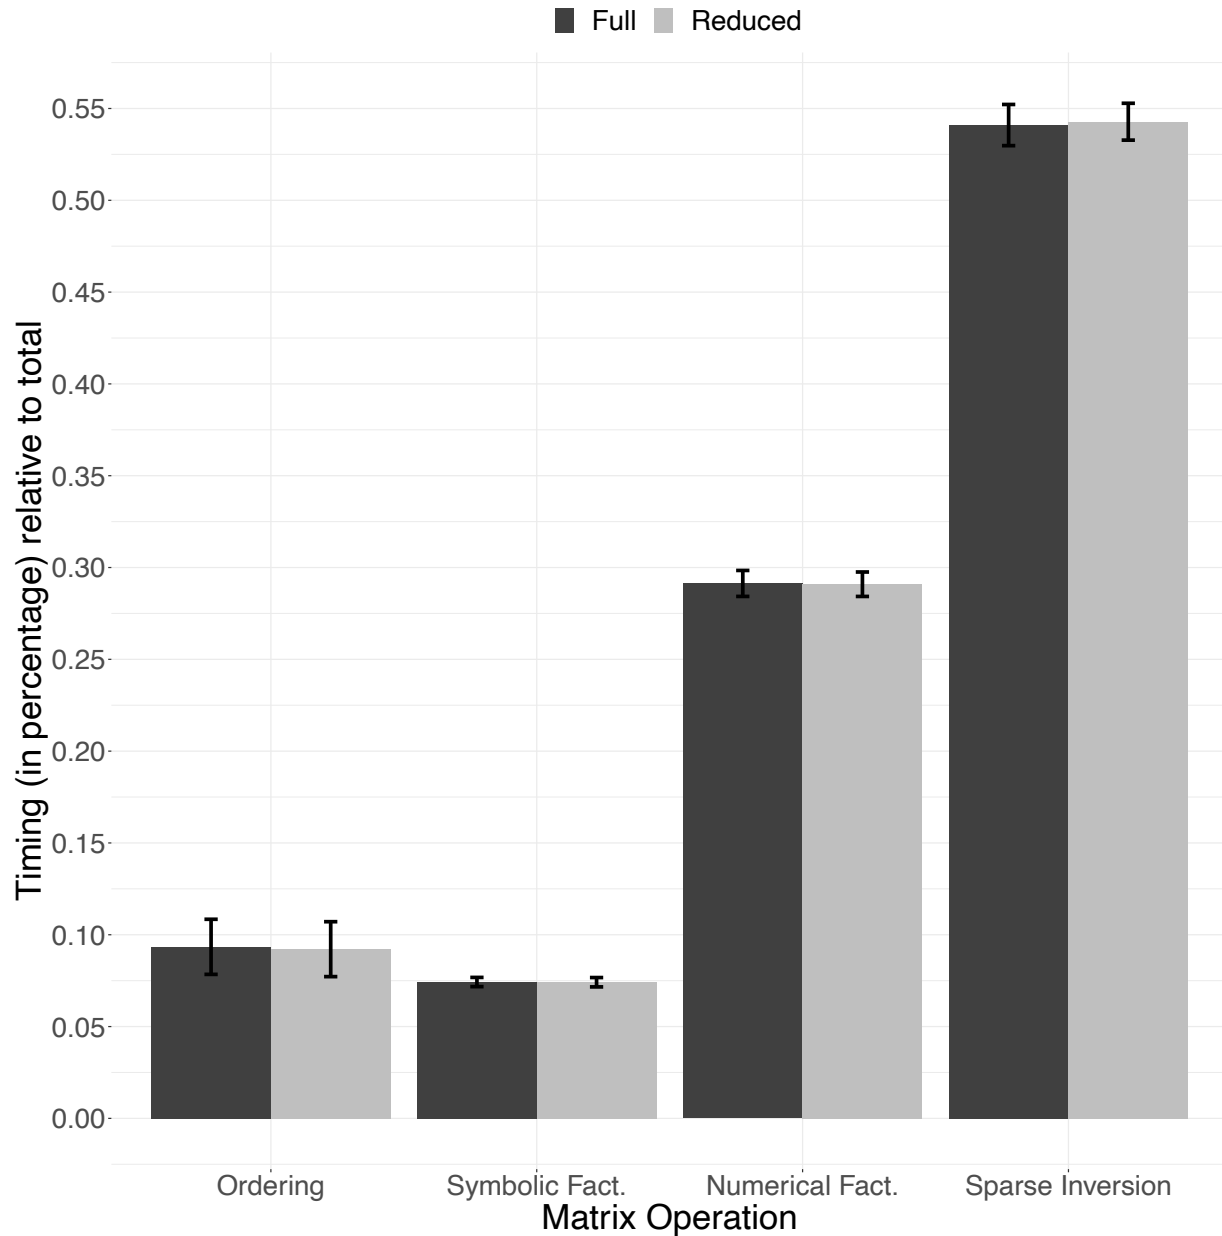

557  
558 **Figure 5.** Average timing in percentage (ratio between total timing) relative to each  
559 operation used in the process of matrix inversion. The average timing and error bars  
560 (standard deviation) were calculated across scenarios using different number of  
561 generations in the pedigree and phenotypic and core sizes. The x-axis represents the  
562 steps required to invert matrices: finding the ordering, symbolic factorization (Symbolic  
563 Fact., setting up the data structure), numerical factorization (Numerical Fact.), and  
564 sparse inversion. Two scenarios were considered, where zeros were stored (Full) or not  
565 (Reduced).

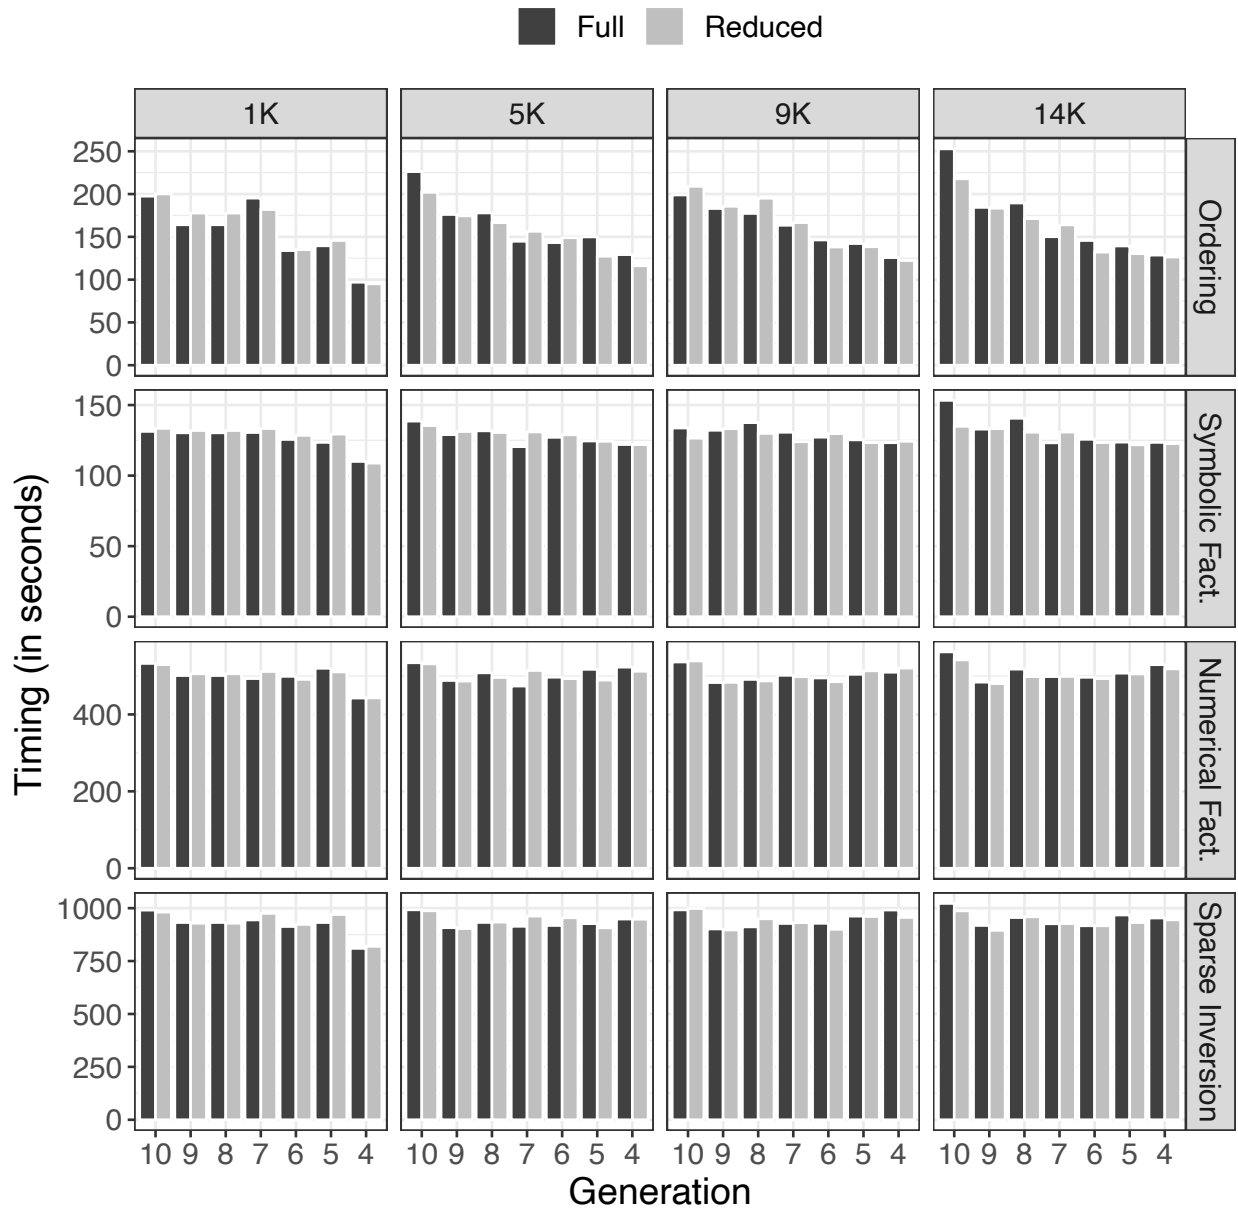

566  
 567 **Figure 6.** Timing (in seconds) relative to each operation to invert matrices using  
 568 different number of generations in the pedigree and phenotypes under different number  
 569 of core animals for the computation of  $APY \mathbf{G}^{-1}$ . Matrix inversion steps: finding the  
 570 ordering (Ordering), symbolic factorization (Symbolic Fact.), numerical factorization  
 571 (Numerical Fact.), and sparse inversion. Two scenarios were considered, where zeros  
 572 were stored (Full) or not (Reduced).  
 573  
 574

575 **Table 1.** Standard deviation of variance components and heritability calculated across  
576 generations using a complete (Full) mixed model equations (MME), and a reduced  
577 MME after skipping zero elements (Reduced).  
578

| Parameter <sup>1</sup> | Core <sup>2</sup> | Scenario |         |
|------------------------|-------------------|----------|---------|
|                        |                   | Full     | Reduced |
| $\sigma_a^2$           | 1K                | 0.037    | 0.037   |
|                        | 5K                | 0.011    | 0.013   |
|                        | 9K                | 0.008    | 0.008   |
|                        | 14K               | 0.005    | 0.005   |
| $\sigma_e^2$           | 1K                | 0.028    | 0.028   |
|                        | 5K                | 0.007    | 0.007   |
|                        | 9K                | 0.005    | 0.005   |
|                        | 14K               | 0.000    | 0.004   |
| $h^2$                  | 1K                | 0.032    | 0.032   |
|                        | 5K                | 0.011    | 0.011   |
|                        | 9K                | 0.005    | 0.005   |
|                        | 14K               | 0.005    | 0.005   |

579 <sup>1</sup> $\sigma_a^2$ : additive variance,  $\sigma_e^2$ : residual variance,  $h^2$ : heritability

580 <sup>2</sup> Number of individuals included as core to build the inverse of genomic matrix using the  
581 algorithm of proven and young (APY)

582

**Table 2.** Descriptive statistics of computing time savings for the matrix operations and the slope of a regression of computing time on generations after removing pedigree and phenotypic data. The benchmark is the model using full pedigree and phenotypic data. The comparison is based on using core group of different sizes in algorithm for proven and young (APY), and based on a full mixed model equations (Full) and a reduced mixed model equations after skipping zero elements (Reduced).

| Core Size | Matrix Operation        | Full    |          |         |                     |                    |              | Reduced |          |         |        |       |    |
|-----------|-------------------------|---------|----------|---------|---------------------|--------------------|--------------|---------|----------|---------|--------|-------|----|
|           |                         | Min (%) | Mean (%) | Max (%) | SD (%) <sup>1</sup> | Slope <sup>2</sup> | <sup>3</sup> | Min (%) | Mean (%) | Max (%) | SD (%) | Slope |    |
| 1K        | Ordering                | 1.16    | 24.58    | 50.94   | 16.98               | -0.07              | **           | 9.10    | 23.95    | 52.47   | 16.99  | -0.08 | ** |
|           | Symbolic Factorization  | 0.61    | 4.77     | 16.22   | 6.04                | -0.02              | **           | 0.08    | 4.57     | 18.44   | 6.92   | -0.02 | *  |
|           | Numerical Factorization | 2.38    | 7.47     | 16.92   | 4.93                | -0.02              | ns           | 3.36    | 6.57     | 16.32   | 4.97   | -0.02 | *  |
|           | Sparse Inversion        | 4.67    | 8.08     | 18.25   | 5.08                | -0.02              | **           | 0.59    | 5.80     | 16.47   | 5.71   | -0.01 | ns |
| 5K        | Ordering                | 21.35   | 32.13    | 42.88   | 8.60                | -0.06              | **           | 13.61   | 26.58    | 42.48   | 11.19  | -0.07 | ** |
|           | Symbolic Factorization  | 4.98    | 9.24     | 13.06   | 3.08                | -0.02              | **           | 3.10    | 5.50     | 9.97    | 2.89   | -0.01 | ** |
|           | Numerical Factorization | 2.13    | 6.21     | 11.34   | 3.47                | -0.00              | ns           | 3.22    | 6.17     | 8.41    | 2.22   | -0.00 | ** |
|           | Sparse Inversion        | 4.39    | 6.81     | 8.52    | 1.48                | -0.00              | ns           | 2.52    | 5.33     | 8.51    | 2.51   | -0.00 | ns |
| 9K        | Ordering                | 7.94    | 21.40    | 36.80   | 11.13               | -0.06              | **           | 6.65    | 24.55    | 41.48   | 13.99  | -0.07 | ns |
|           | Symbolic Factorization  | 2.76    | 6.39     | 10.33   | 2.97                | -0.01              | **           | 2.48    | 5.19     | 7.43    | 2.20   | -0.01 | ns |
|           | Numerical Factorization | 4.96    | 7.26     | 9.98    | 1.82                | -0.00              | ns           | 3.45    | 7.63     | 10.33   | 2.93   | -0.00 | ns |
|           | Sparse Inversion        | 0.07    | 5.52     | 9.08    | 3.38                | -0.00              | ns           | 3.77    | 6.59     | 10.14   | 2.82   | -0.00 | ns |
| 14K       | Ordering                | 25.04   | 38.19    | 49.13   | 9.85                | -0.07              | **           | 15.79   | 30.57    | 41.97   | 11.27  | -0.07 | ** |
|           | Symbolic Factorization  | 8.28    | 16.33    | 19.63   | 4.61                | -0.03              | **           | 1.26    | 5.79     | 9.71    | 3.72   | -0.02 | ** |
|           | Numerical Factorization | 5.92    | 10.15    | 13.99   | 2.89                | -0.00              | ns           | 4.32    | 7.91     | 11.39   | 2.35   | -0.00 | ns |
|           | Sparse Inversion        | 5.34    | 8.09     | 10.32   | 2.14                | -0.01              | ns           | 2.85    | 5.88     | 9.32    | 2.25   | -0.00 | ns |

<sup>1</sup> Standard deviation

<sup>2</sup> Slope of a regression of computing time on generations

<sup>3</sup> Slope statistical significance \* P<0.05, \*\*P<0.10, <sup>ns</sup>not significant

bioRxiv preprint doi: <https://doi.org/10.1101/2022.01.19.476983>; this version posted January 21, 2022. The copyright holder for this preprint (which was not certified by peer review) is the author/funder, who has granted bioRxiv a license to display the preprint in perpetuity. It is made available under a [CC-BY-NC-ND 4.0 International license](#).

1

2
